# Supplementary material for: Druggability of cavity pockets within SARS-CoV-2 spike glycoprotein and pharmacophore-based drug discovery
Source: Future Virol. 2021 Jun 1:10.2217/fvl-2020-0394. doi: 10.2217/fvl-2020-0394 (PMC8176656; doi:10.2217/fvl-2020-0394)
Supplement: Supplementary file 4 [file Table_S1.xlsx]

## Sheet: Table S1 (002)
Table S1. Chemical descriptors of 10 derivatives of Compound 38
Molecule	Canonical SMILES	Formula	MW	#Heavy atoms	#Aromatic heavy atoms	Fraction Csp3	#Rotatable bonds	#H-bond acceptors	#H-bond donors	MR	TPSA	iLOGP	XLOGP3	WLOGP	MLOGP	Silicos-IT Log P	Consensus Log P	ESOL Log S	ESOL Solubility (mg/ml)	ESOL Solubility (mol/l)	ESOL Class	Ali Log S	Ali Solubility (mg/ml)	Ali Solubility (mol/l)	Ali Class	Silicos-IT LogSw	Silicos-IT Solubility (mg/ml)	Silicos-IT Solubility (mol/l)	Silicos-IT class	GI absorption	BBB permeant	Pgp substrate	CYP1A2 inhibitor	CYP2C19 inhibitor	CYP2C9 inhibitor	CYP2D6 inhibitor	CYP3A4 inhibitor	log Kp (cm/s)	Lipinski #violations	Ghose #violations	Veber #violations	Egan #violations	Muegge #violations	Bioavailability Score	PAINS #alerts	Brenk #alerts	Leadlikeness #violations	Synthetic Accessibility
Molecule 1	C=CC=CNC1C(=C(N=C1c1ccc(cc1)[N+](=O)[O-])c1ccccc1)c1cccc(c1)c1nc([nH]c1c1ccccc1)c1ccc(cc1)[N+](=O)[O-]	C41H30N6O4	670.71	51	35	0.02	11	6	2	207.99	144.71	4.23	8.86	8.88	3.58	5.72	6.25	-9.36	2.91e-07	4.34e-10	Poorly soluble	-11.78	1.1e-09	1.64e-12	Insoluble	-13.65	1.51e-11	2.25e-14	Insoluble	Low	No	Yes	Yes	No	No	No	No	-4.1	1	4	2	2	2	0.55	1	4	3	5.77
Molecule 2	CC=CN[CH]C1C(=C(N=C1c1ccc(cc1)[N+](=O)[O-])c1ccccc1)c1cccc(c1)c1nc([nH]c1c1ccccc1)c1ccc(cc1)[N+](=O)[O-]	C41H31N6O4	671.72	51	35	0.07	11	6	2	207.41	144.71	0	8.35	8.83	3.64	5.73	5.31	-9.05	6.03e-07	8.97e-10	Poorly soluble	-11.25	3.73e-09	5.56e-12	Insoluble	-13.99	6.87e-12	1.02e-14	Insoluble	Low	No	Yes	Yes	No	No	No	Yes	-4.47	1	4	2	2	2	0.55	1	3	3	5.8
Molecule 3	C=CNCCC1C(=C(N=C1c1ccc(cc1)[N+](=O)[O-])c1ccccc1)c1cccc(c1)c1nc([nH]c1c1ccccc1)c1ccc(cc1)[N+](=O)[O-]	C41H32N6O4	672.73	51	35	0.07	12	6	2	208.46	144.71	4.34	8.48	8.96	3.64	5.9	6.26	-9.07	5.74e-07	8.53e-10	Poorly soluble	-11.39	2.74e-09	4.08e-12	Insoluble	-14.36	2.91e-12	4.33e-15	Insoluble	Low	No	Yes	Yes	No	No	No	No	-4.38	1	4	2	2	2	0.55	1	3	3	5.75
Molecule 4	CCCCCC1NC(=NC(=C1c1cccc(c1)c1nc([nH]c1c1ccccc1)c1ccc(cc1)[N+](=O)[O-])c1ccccc1)c1ccc(cc1)[N+](=O)[O-]	C42H36N6O4	688.77	52	35	0.14	12	6	2	217.66	144.71	4.39	9.24	9.33	4.95	6.36	6.85	-9.64	1.59e-07	2.3e-10	Poorly soluble	-12.18	4.57e-10	6.63e-13	Insoluble	-15.09	5.59e-13	8.11e-16	Insoluble	Low	No	Yes	Yes	No	No	No	No	-3.94	2	4	2	2	2	0.17	1	3	3	6
Molecule 5	[O-][N+](=O)c1ccc(cc1)C1=NC(=C([Br]1)c1cccc(c1)c1nc([nH]c1c1ccccc1)c1ccc(cc1)[N+](=O)[O-])c1ccccc1	C36H23BrN5O4	669.5	46	35	0	8	6	1	191.03	132.68	0	8.42	9.06	4.14	5.6	5.44	-9.33	3.13e-07	4.67e-10	Poorly soluble	-11.07	5.63e-09	8.42e-12	Insoluble	-13.87	9.07e-12	1.36e-14	Insoluble	Low	No	No	No	No	No	No	Yes	-4.41	1	3	0	2	2	0.55	1	3	3	4.98
Molecule 6	[O-][N+](=O)c1ccc(cc1)C1=NC(=C([Cl]1)c1cccc(c1)c1nc([nH]c1c1ccccc1)c1ccc(cc1)[N+](=O)[O-])c1ccccc1	C36H23ClN5O4	625.05	46	35	0	8	6	1	187.95	132.68	0	8.35	8.91	4.05	5.57	5.37	-9.01	6.1e-07	9.75e-10	Poorly soluble	-11	6.22e-09	9.95e-12	Insoluble	-13.7	1.26e-11	2.02e-14	Insoluble	Low	No	No	No	No	No	No	Yes	-4.18	1	3	0	2	2	0.55	1	3	3	4.9
Molecule 7	[O-][N+](=O)c1ccc(cc1)C1=NC(=C(C1)c1cccc(c1)c1nc([nH]c1c1ccccc1)c1ccc(cc1)[N+](=O)[O-])c1ccccc1	C37H25N5O4	603.63	46	35	0.03	8	6	1	186.91	132.68	3.86	7.47	8.61	3.78	5.33	5.81	-8.32	2.87e-06	4.75e-09	Poorly soluble	-10.09	4.92e-08	8.15e-11	Insoluble	-13.38	2.49e-11	4.13e-14	Insoluble	Low	No	No	Yes	No	No	No	No	-4.68	1	4	0	2	2	0.55	1	3	3	4.79
Molecule 8	[O-][N+](=O)c1ccc(cc1)C1=NC(=C(OCC1)c1cccc(c1)c1nc([nH]c1c1ccccc1)c1ccc(cc1)[N+](=O)[O-])c1ccccc1	C38H27N5O5	633.65	48	35	0.05	8	7	1	192.8	141.91	3.51	7.65	8.58	3.19	5.13	5.61	-8.6	1.59e-06	2.51e-09	Poorly soluble	-10.47	2.15e-08	3.39e-11	Insoluble	-13.36	2.75e-11	4.35e-14	Insoluble	Low	No	No	Yes	No	No	No	No	-4.73	1	4	1	2	2	0.55	1	3	3	5.16
Molecule 9	[O-][N+](=O)c1ccc(cc1)C1=NC(=C(NCC1)c1cccc(c1)c1nc([nH]c1c1ccccc1)c1ccc(cc1)[N+](=O)[O-])c1ccccc1	C38H28N6O4	632.67	48	35	0.05	8	6	2	198.43	144.71	3.67	7.66	7.77	3.19	4.82	5.42	-8.6	1.59e-06	2.51e-09	Poorly soluble	-10.54	1.83e-08	2.89e-11	Insoluble	-13.68	1.34e-11	2.11e-14	Insoluble	Low	No	No	Yes	No	No	No	No	-4.72	1	4	1	2	2	0.55	1	3	3	5.06
Molecule 10	c1(cc(ccc1)C1=C(N=C(H1)c1ccc(cc1)[N+](=O)[O-])c1ccccc1)c1nc([nH]c1c1ccccc1)c1ccc(cc1)[N+](=O)[O-]	C36H25N5O4	0	0	0	0.05	0	6	2	0	0	3.67	7.66	7.77	3.19	4.82	5.42	-8.6	1.59e-06	2.51e-09	Poorly soluble	-10.54	1.83e-08	2.89e-11	Insoluble	-13.68	1.34e-11	2.11e-14	Insoluble	Low	No	No	Yes	No	No	No	No	-4.72	1	4	1	2	2	0.55	1	3	3	5.06
